# Supplementary material for: Camel Hemorphins Exhibit a More Potent Angiotensin-I Converting Enzyme Inhibitory Activity than Other Mammalian Hemorphins: An In Silico and In Vitro Study
Source: MDPI journal article supplement (doi:10.3390/biom10030486), 2020-03-23
Supplement: s1 [file s1]

Amanat Ali<sup>1</sup>, Seham Rashed Ali Alzeyoudi<sup>1</sup>, Shamma Saleh Almutawa<sup>1</sup>, Alya Nasir Alnajjar  
Banialnajjar<sup>1</sup>, Yusra Al Dhaheri<sup>1</sup> and Ranjit Vijayan<sup>1\*</sup>

\*Correspondence: Tel: +971 3 713 6302, Email: ranjit.v@uaeu.ac.ae

## A

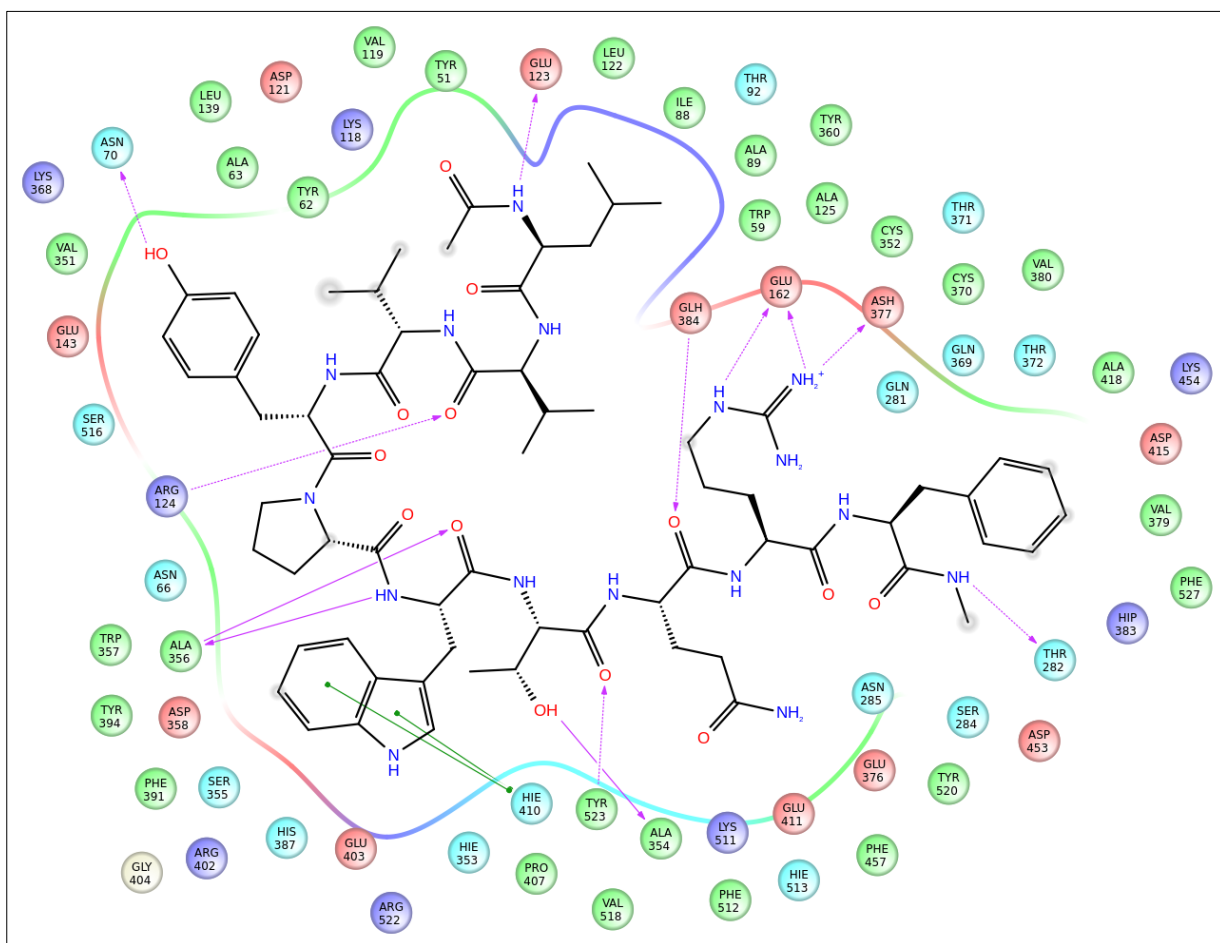

**B**

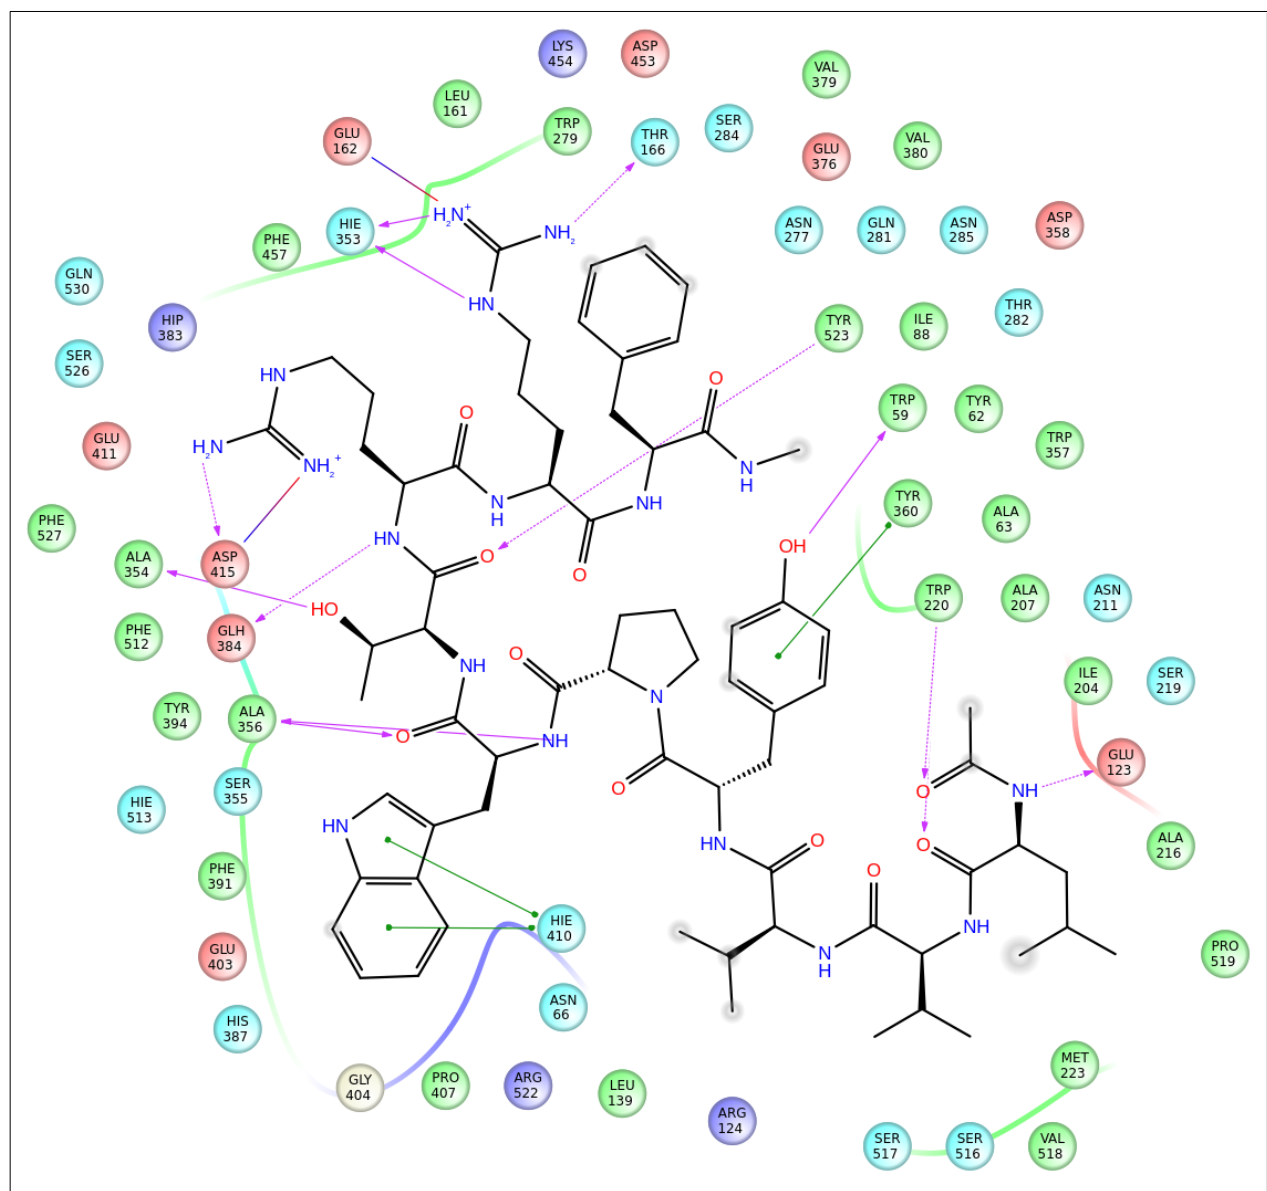

**Figure S1.** Interactions of LVV-hemorphin-7 with ACE. A) ACE-LVVYPWTQRF. B) ACE-LVVYPWTRRF.

A

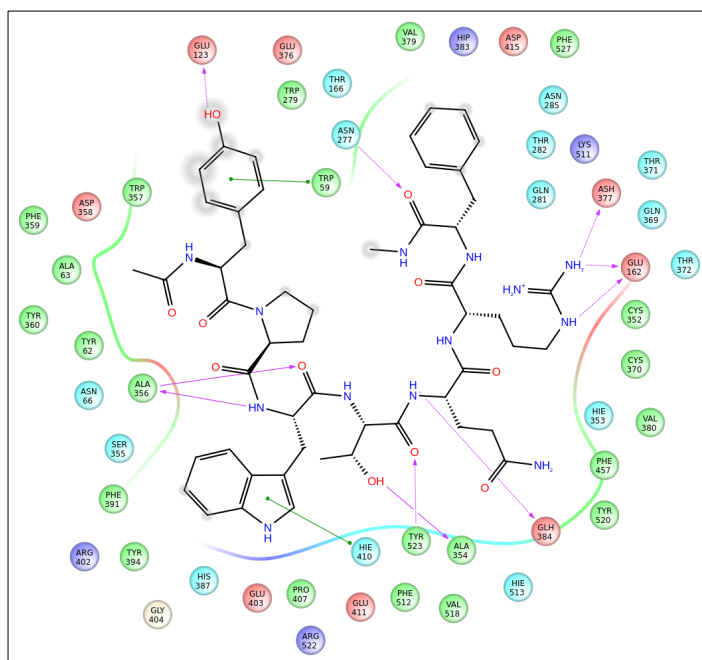

B

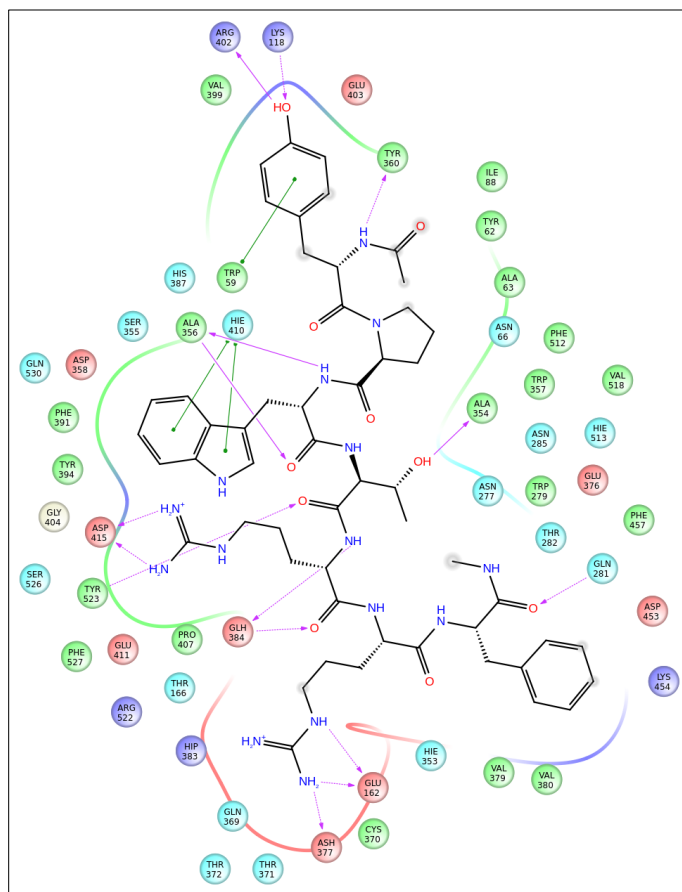

**Figure S2.** Interactions of hemorphin-7 with ACE. A) ACE-YPWTQRF. B) ACE-YPWTRRF
